# Supplementary material for: Ethnopharmacology for Skin Diseases and Cosmetics during the COVID-19 Pandemic in Lithuania
Source: MDPI journal article supplement (doi:10.3390/ijerph19074054), 2022-03-29
Supplement: s1 [file s1]

**Table S1.** Ethnopharmaceuticals for skin diseases and cosmetics in Siauliai district, Lithuania

| Family                | Botanical name                           | Local plant name   | Used for skin diseases - L<br>Used in cosmetics - K | Frequency of citations | Part used       | Method of preparation   | Therapeutic and cosmetic uses                    | EMA evaluation |
|-----------------------|------------------------------------------|--------------------|-----------------------------------------------------|------------------------|-----------------|-------------------------|--------------------------------------------------|----------------|
| <i>Arecaceae</i>      | <i>Cocos nucifera</i> L.                 | Kokosas            | K                                                   | 10                     | Fruits          | Oil                     | For dry hair<br>For dry skin                     |                |
| <i>Acoraceae</i>      | <i>Acorus calamus</i> L.                 | Ajaras             | KL                                                  | 15                     | Roots<br>Leaves | Decoction<br>Powder     | From hair loss<br>For dry hair<br>Wounds healing |                |
| <i>Amaryllidaceae</i> | <i>Allium cepa</i> L.                    | Cibulis,<br>Cibule | L                                                   | 25                     |                 | Application on the skin | From insect bites<br>For abscesses               |                |
| <i>Apiaceae</i>       | <i>Daucus carota</i> L.                  | Muorkva            | L                                                   | 10                     | Roots           | Compress                | For burns<br>Wounds healing                      |                |
| <i>Apiaceae</i>       | <i>Petroselinum crispum</i> (Mill.) Fuss | Petruška           | KL                                                  | 9                      | Leaves<br>Roots | Juice<br>Decoction      | From bee and mosquito bites<br>For sunburns      |                |
| <i>Apiaceae</i>       | <i>Angelica archangelica</i> L.          | Švengaršvė         | L                                                   | 1                      | Roots           | Decoction               | For the treatment of acne and eczema             |                |

|                      |                                 |                         |    |    |              |                       |                                                                                             |                                                                                                                                                 |
|----------------------|---------------------------------|-------------------------|----|----|--------------|-----------------------|---------------------------------------------------------------------------------------------|-------------------------------------------------------------------------------------------------------------------------------------------------|
| <i>Araliaceae</i>    | <i>Hedera helix</i> L.          | Lipiki                  | L  | 2  | Leaves       | Decoction             | For burns                                                                                   | EMA/HMPC/228356/2012 <i>Hederae helix folium</i> ; Cough and cold                                                                               |
| <i>Asphodelaceae</i> | <i>Aloe vera</i> Mill.          | Alijošius<br>Elijuošius | KL | 35 | Leaves       | Juice                 | Wound healing<br>For frosbite shun-<br>votes<br>For dry skin                                | EMA/807482/2016 <i>Aloe vera folium</i> ;<br>For short-term use in cases of occasional constipation                                             |
| <i>Asteraceae</i>    | <i>Matricaria recutita</i> L.   | Ramuliukai<br>Ramunėlis | KL | 15 | Flowers      | Compress              | Wounds healing<br>From swollen eyes                                                         | EMA/490629/2015 <i>Matricariae flos</i> ; Gastrointestinal disorders; Cough and cold; Mouth and throat disorders; Skin disorders & minor wounds |
| <i>Asteraceae</i>    | <i>Artemisia dracunculus</i> L. | Kėtis                   | L  | 1  | Aerial parts | Decoction             | From snake bites                                                                            |                                                                                                                                                 |
| <i>Asteraceae</i>    | <i>Bidens tripartita</i> L.     | Šuniulai                | L  | 3  | Aerial parts | Decoction<br>Compress | Wounds healing<br>From rashes                                                               |                                                                                                                                                 |
| <i>Asteraceae</i>    | <i>Arctium lappa</i> L.         | Kibišas                 | L  | 17 | Roots        | Decoction             | Seborians<br>From insect bites<br>From the incisions,<br>From the burns<br>From the bruises | EMA/HMPC/509409/2019 <i>Arctii radix</i> ;<br>Urinary tract and genital disorders;<br>Loss of appetite;<br>Skin disorders and minor wounds      |
| <i>Asteraceae</i>    | <i>Arnica montana</i> L.        | Arnikas                 | L  | 21 | Flowers      | Tincture              | Wounds healing<br>From the bruises                                                          | EMA/654173/2016                                                                                                                                 |

|                   |                                                     |             |    |   |              |                         |                                                          |                                                                                                                                                                                                             |
|-------------------|-----------------------------------------------------|-------------|----|---|--------------|-------------------------|----------------------------------------------------------|-------------------------------------------------------------------------------------------------------------------------------------------------------------------------------------------------------------|
|                   |                                                     |             |    |   |              |                         |                                                          | <i>Arnicae flos</i> ; Skin disorders and minor wounds                                                                                                                                                       |
| <i>Asteraceae</i> | <i>Echinaceae purpurea</i> (L.) Moench              | Ežiuoli     | L  | 6 | Aerial parts | Juice                   | Wounds healing                                           | EMA/481797/2015<br><i>Echinaceae purpureae herba</i> ;<br>Skin disorders and minor wounds;<br><i>Echinaceae purpureae radix</i> ; Cough and cold;<br>Skin disorders and minor wounds                        |
| <i>Asteraceae</i> | <i>Taraxacum officinale</i> (L.) Weber ex F.H.Wigg. | Pienė       | L  | 4 | Leaves       | Application on the skin | From a bee bite                                          | EMA/HMPC/579636/2008 <i>Taraxaci folium</i> ;<br><br>Urinary tract and genital disorders;<br>Taraxaci radix cum herba; Gastrointestinal disorders; Loss of appetite; Urinary tract and gynecology disorders |
| <i>Asteraceae</i> | <i>Tagetes erecta</i> L.                            | Sekrečiukai | KL | 2 | Flowers      | Excerpt                 | Wounds healing<br>From skin fungus<br>To reduce sweating |                                                                                                                                                                                                             |
| <i>Asteraceae</i> | <i>Artemisia vulgaris</i> L.                        | Metėle      | L  | 2 | Stem         | Juice                   | Wounds healing                                           |                                                                                                                                                                                                             |

|                   |                                         |            |   |    |                   |                       |                                                                                                                            |                                                                                                                                            |
|-------------------|-----------------------------------------|------------|---|----|-------------------|-----------------------|----------------------------------------------------------------------------------------------------------------------------|--------------------------------------------------------------------------------------------------------------------------------------------|
| <i>Asteraceae</i> | <i>Inula helenium</i> L.                | Debesyla   | L | 3  | Roots             | Decoction             | For the treatment<br>eczema and her-<br>pes<br>To reduce itching                                                           |                                                                                                                                            |
| <i>Asteraceae</i> | <i>Centaurea cyanus</i><br>L.           | Vasilka    | K | 3  | Flowers           | Compress              | For balckened ,<br>bruised eyes<br>For inflammation<br>of the eyelids<br>To reduce wrin-<br>kles                           | EMA/HMPC/228356/2<br>012<br><i>Centaurii herba</i> ;Gas-<br>tointestinal disor-<br>ders;Loss of appetite                                   |
| <i>Asteraceae</i> | <i>Tussilago farfara</i><br>L.          | Žalpusnis  | L | 7  | Leaves<br>Flowers | Decoction             | To treat shun-<br>votes and ab-<br>scesses<br>To treat rose<br>For beaten places<br>For the treatment<br>of ulcerated skin |                                                                                                                                            |
| <i>Asteraceae</i> | – <i>Calendula offic-<br/>inalis</i> L. | Naudatka   | L | 15 | Flowers           | Decoction<br>Compress | To treat eczema<br>and dermatitis<br>To reduce rashes                                                                      | EMA/HMPC/228356/2<br>012<br><i>Calendulae<br/>officinalis flos</i> ;<br>Skin disorders and mi-<br>nor wounds;Mouth and<br>throat disorders |
| <i>Asteraceae</i> | <i>Achilea mille-<br/>folium</i> L.     | Kruvinžolė | L | 1  | Flowers           | Compress              | For bruises,<br>wounds, chest<br>tears                                                                                     | EMA/HMPC/228356/2<br>012                                                                                                                   |

|                     |                                                       |            |   |    |                        |                            |                                                                |                                                                                                                                                                                                                                                                                                 |
|---------------------|-------------------------------------------------------|------------|---|----|------------------------|----------------------------|----------------------------------------------------------------|-------------------------------------------------------------------------------------------------------------------------------------------------------------------------------------------------------------------------------------------------------------------------------------------------|
|                     |                                                       |            |   |    |                        |                            |                                                                | <i>Millefolii flos</i> ; Loss of appetite; Gastrointestinal disorders; Skin disorders and minor wounds; Urinary tract and genital disorders<br><br><i>Millefolii herba</i> ; Loss of appetite; Gastrointestinal disorders; Skin disorders and minor wounds; Urinary tract and genital disorders |
| <i>Betulaceae</i>   | <i>Betula pendula</i> Roth                            | Svyruoklis | K | 4  | Bark<br>Buds<br>Leaves | Juice<br>Infusion          | From freckles<br>To reduce acne and blackheads<br>For dry skin | EMA/HMPC/228356/2012<br><br><i>Betulae folium</i> ; Urinary tract and genital disorders                                                                                                                                                                                                         |
| <i>Boraginaceae</i> | <i>Symphytum officinale</i> L.                        | Taukius    | L | 5  | Roots<br>Leaves        | Compress<br>Decoction      | Wounds healing<br>For beaten places                            | EMA/HMPC/333915/2015<br><br><i>Symphyti radix</i> ; Pain and inflammation                                                                                                                                                                                                                       |
| <i>Brassicaceae</i> | <i>Brassica oleracea</i> L.                           | Kopūsts    | L | 20 | Leaves                 | Sultys                     | To reduce redness of the face<br>To extract heat               |                                                                                                                                                                                                                                                                                                 |
| <i>Brassicaceae</i> | <i>Brassica napus</i> L.                              | Rapsas     | L | 3  | Leaves                 | Decoction                  | To treat eczema and acne                                       |                                                                                                                                                                                                                                                                                                 |
| <i>Brassicaceae</i> | <i>Armoracia rusticana</i> P.Gaertn., B.Mey. & Scherb | Kriens     | K | 5  | Roots                  | Puree<br>Compress<br>Kaukē | For pigmented spots<br>From pimples                            |                                                                                                                                                                                                                                                                                                 |

|                           |                                            |                               |    |    |                         |                          |                                                                                       |                                                                                                                                      |
|---------------------------|--------------------------------------------|-------------------------------|----|----|-------------------------|--------------------------|---------------------------------------------------------------------------------------|--------------------------------------------------------------------------------------------------------------------------------------|
|                           |                                            |                               |    |    |                         |                          | From wrinkles                                                                         |                                                                                                                                      |
| <i>Caprifoliaceae</i>     | <i>Viburnum opulus</i> L.                  | Putins                        | L  | 2  | Fruits                  | Juice<br>Tincture        | From rashes<br>For purulent skin                                                      |                                                                                                                                      |
| <i>Caryophyllaceae</i>    | <i>Saponaria officinalis</i> L.            | Muilažolē<br>Muilini          | K  | 2  | Flowers                 | Juice                    | To remove dirt<br>For dry skin                                                        |                                                                                                                                      |
| <i>Commelinaceae</i>      | <i>Calissia fragnans</i> (Lindl.) Woodson. | Auksinis<br>ūsas              | KL | 1  | Leaves<br>Shoot<br>Stem | Juice<br>Ointment<br>Oil | For skin dermatitis<br>From burns<br>From frostbite<br>From the bruises<br>From scars |                                                                                                                                      |
| <i>Crassulaceae</i>       | <i>Kalanchoe angustifolia</i> A. Rich.     | Paleistuvē                    | L  | 3  | Leaves                  | Juice                    | Wounds healing                                                                        |                                                                                                                                      |
| <i>Cucurbitaceae</i><br>– | <i>Bryonia dioica</i> Jacq.                | Brienē                        | L  | 1  | Roots                   | Compress                 | From the shocks                                                                       |                                                                                                                                      |
| <i>Eleagnaceae</i>        | <i>Hippophae rhamnoides</i> L.             | Šaltakšnis                    | L  | 16 | Fruits                  | Oil                      | From burns                                                                            |                                                                                                                                      |
| <i>Equisetophyta</i>      | <i>Equisetum arvense</i> L.                | Driežgegužē<br>Dirvinē eglikē | L  | 2  | Aerial parts            | Extract<br>Decoction     | From abraded blisters<br>Wounds healing                                               | EMA/HMPC/278091/2015<br><i>Equiseti herba</i> ; Urinary tract and genital disorders; For supportive treatment of superficial wounds. |
| <i>Ericaceae</i>          | <i>Ledum palustre</i> L.                   | Velnio šluota                 | L  | 5  | Aerial parts            | Decoction                | From insect bites<br>From swelling<br>Wounds healing                                  |                                                                                                                                      |

|                       |                                         |                                             |    |   |              |           |                                                |                                                                                                                                                 |
|-----------------------|-----------------------------------------|---------------------------------------------|----|---|--------------|-----------|------------------------------------------------|-------------------------------------------------------------------------------------------------------------------------------------------------|
| <i>Ericaceae</i>      | <i>Rhododendrum ter-mopsum</i> L.       | Rododen-dras                                | L  | 1 | Aerial parts | Decoction | For the treatment of warts                     |                                                                                                                                                 |
| <i>Fabaceae</i>       | <i>Trigonella foe-num -graecum</i> L.   | Uožragi                                     | L  | 2 | Seeds        | Decoction | Wounds healing                                 | EMA/HMPC/146221/2010<br><br><i>Foenugraeci se-men</i> ; Skin disorders and minor wounds; Loss of appetite                                       |
| <i>Fabaceae</i>       | <i>Anthyllis vul-neraria</i> L.         | Perluotis                                   | L  | 1 | Flowers      | Juice     | Wounds healing                                 |                                                                                                                                                 |
| <i>Fabaceae</i>       | <i>Pisum sativum</i> L.                 | Žirneliai                                   | L  | 5 | Seeds        | Compress  | For abscesses<br>To treat shun-votes           |                                                                                                                                                 |
| <i>Urticaceae</i>     | <i>Urtica dioica</i> L.                 | Dilgelikė                                   | KL | 1 | Aerial parts | Decoction | For dry skin<br>Wounds healing<br>For dry hair | EMA/HMPC/228356/2012<br><i>Urticae herba</i><br>Urinary tract and genital disorders<br>Pain and inflammation<br>Skin disorders and minor wounds |
| <i>Hydran-geaceae</i> | <i>Philadelphus seri-canthus</i> Koehne | Jazminas                                    | K  | 2 | Flowers      | Oil       | For dry skin                                   |                                                                                                                                                 |
| <i>Hypericaceae</i>   | <i>Hypericum perfo-ratum</i> L.         | Joniukas<br>Marijos<br>žolikė<br>Brandažolė | KL | 6 | Aerial parts | Oil       | Wounds healing<br>For tears in the fingers     | EMA/HMPC/101304/2008                                                                                                                            |

|                      |                                         |              |    |    |                                |                                        |                                                                                   |                                                                                                                       |
|----------------------|-----------------------------------------|--------------|----|----|--------------------------------|----------------------------------------|-----------------------------------------------------------------------------------|-----------------------------------------------------------------------------------------------------------------------|
|                      |                                         |              |    |    |                                |                                        |                                                                                   | <i>Hyperici herba</i> ; Mental stress and mood disorders; Skin disorders and minor wounds; Gastrointestinal disorders |
| <i>Lamiaceae</i>     | <i>Glechoma heter-<br/>acea</i> L.      | Laukžolē     | KL | 2  | Aerial<br>parts                | Compress                               | From the ab-<br>scesses<br>For split skin<br>For scratched<br>skin                |                                                                                                                       |
| <i>Lamiaceae</i>     | <i>Origanum vul-<br/>gare</i> L.        | Raudonēlēs   | KL | 4  | Aerial<br>parts                | Decoction                              | Wounds healing<br>To treat shun-<br>votes<br>Oily face and<br>scalp rinse         |                                                                                                                       |
| <i>Lycopodiaceae</i> | <i>Lycopodium<br/>clavatum</i> L.       | Šarkažolē    | KL | 5  | Spores                         | Ointment                               | For dry skin<br>For rashes                                                        |                                                                                                                       |
| <i>Linaceae</i>      | <i>Linum usitatissi-<br/>mum</i> L.     | Linelis      | K  | 2  | Seeds                          | Oil                                    | Dried elbows                                                                      | EMA/492394/2015<br>Corr.<br><i>Lini semen</i> ; Gastroin-<br>testinal disorders                                       |
| <i>Malvaceae</i>     | <i>Tilia cordata</i><br>Mill.           | Liepžiedžiai | KL | 4  | Bark                           | Application on<br>the skin<br>Compress | From scratches<br>From burns<br>For swollen eyes<br>For the treatment<br>of roses |                                                                                                                       |
| <i>Melanthiaceae</i> | <i>Veratrum lobeli-<br/>anum</i> Bernh. | Čemeryčia    | K  | 10 | Rhi-<br>zomes<br>with<br>roots | Juice                                  | From lice                                                                         |                                                                                                                       |



|                       |                                 |                            |   |    |                      |                         |                                                       |                                                                                          |
|-----------------------|---------------------------------|----------------------------|---|----|----------------------|-------------------------|-------------------------------------------------------|------------------------------------------------------------------------------------------|
| <i>Onagraceae</i>     | <i>Oenothera biennis</i> L.     | Nakviša                    | L | 11 | Seeds                | Oil                     | To treat eczema, dermatitis<br>From rashes            | EMA/422144/2018<br><br><i>Oenotherae biennis oleum</i> ; Skin disorders and minor wounds |
| <i>Papaveraceae</i>   | <i>Chelidonium majus</i> L.     | Kapažolē<br>Karpžolē       | L | 35 | Stem<br>Aerial parts | Juice<br>Decoction      | For the treatment of warts<br>For psoriasis           |                                                                                          |
| <i>Papaveraceae</i>   | <i>Papaver somniferum</i> L.    | Agona<br>Agūna<br>Aguoneli | L | 2  | Seeds                | Oil                     | Wounds healing                                        |                                                                                          |
| <i>Plantaginaceae</i> | <i>Plantago major</i> L.        | Trauklapis<br>Gyslapis     | L | 40 | Leaves               | Application on the skin | Wounds healing                                        |                                                                                          |
| <i>Poaceae</i>        | <i>Elymus repens</i> (L.) Gould | Varputē                    | L | 2  | Roots                | Decoction               | Wounds healing<br>To remove furuncles<br>From rashes  |                                                                                          |
| <i>Rhamnaceae</i>     | <i>Frangula alnus</i> Mill.     | Skirpstē                   | L | 1  | Fruits               | Oil                     | For burns                                             | EMA/HMPC/726261/2016<br><i>Frangulae cortex</i> ; Constipation                           |
| <i>Rosaceae</i>       | <i>Alchemilla vulgaris</i> L.   | Raskila                    | L | 3  | Leaves               | Juice                   | From insect bites<br>Wounds healing<br>From abrasions |                                                                                          |
| <i>Rosaceae</i>       | <i>Sorbus aucuparia</i> L.      | Šermukšlē                  | L | 5  | Fruits               | Juice                   | For the treatment of warts                            |                                                                                          |
| <i>Rosaceae</i>       | <i>Rosa arvensis</i> L.         | Šunrožē                    | L | 10 | Flowers              | Oil                     | To treat eczema and dermatitis                        | EMA/HMPC/137299/2013<br><br><i>Rosae flos</i> ; Mouth and throat disorders; Skin         |

|                 |                               |                          |    |   |              |                     |                                                                                                                     |                                                                                                                                                                               |
|-----------------|-------------------------------|--------------------------|----|---|--------------|---------------------|---------------------------------------------------------------------------------------------------------------------|-------------------------------------------------------------------------------------------------------------------------------------------------------------------------------|
|                 |                               |                          |    |   |              |                     |                                                                                                                     | disorders & minor wounds                                                                                                                                                      |
| <i>Rosaceae</i> | <i>Potentilla anserina</i> L. | Žąsiažolė<br>Sidabriukai | L  | 3 | Aerial parts | Decoction           | For rinsing wounds                                                                                                  |                                                                                                                                                                               |
| <i>Rosaceae</i> | <i>Rosa majalis</i> Herm.     | Erškėtis                 | L  | 4 | Seeds        | Oil                 | For the treatment of skin cracks, abrasions, bed-sores, non – healing ulcers                                        |                                                                                                                                                                               |
| <i>Rosaceae</i> | <i>Filipendula ulmaria</i> L. | Vingiuorykštė            | KL | 3 | Flowers      | Decoction<br>Powder | For rinsing wounds<br>For the treatment of furuncles<br>To treat eczema<br>Powder is spreaded on the scattered area | EMA/HMPC/228356/2012<br><i>Filipendulae ulmariae flos</i> ; Cough and cold; Pain and inflammation; <i>Filipendulae ulmariae herba</i> ; cough and cold; Pain and inflammation |
| <i>Rosaceae</i> | <i>Agrimonia eupatoria</i> L. | Dirvuoli                 | L  | 2 | Aerial parts | Decoction           | Wounds healing                                                                                                      |                                                                                                                                                                               |
| <i>Rosaceae</i> | <i>Rosa canina</i> Siev.      | Erškėtis                 | K  | 6 | Flowers      | Decoction           | Skin rejuvenation and softening                                                                                     | EMA/HMPC/137299/2013<br><i>Rosae flos</i> ; Mouth and throat disorders; Skin disorders & minor wounds                                                                         |
| <i>Rutaceae</i> | <i>Citrus bergamia</i> Risso  | Bergamuotė               | KL | 2 | Fruit's Peel | Oil                 | To remove scars                                                                                                     |                                                                                                                                                                               |

|                         |                                      |             |    |    |              |           |                                                |                                                                                         |
|-------------------------|--------------------------------------|-------------|----|----|--------------|-----------|------------------------------------------------|-----------------------------------------------------------------------------------------|
|                         |                                      |             |    |    |              |           | For the treatment of skin fungus               |                                                                                         |
| <i>Scrophulariaceae</i> | <i>Verbascum thapsiforme</i> Schrad. | Devynvaisti | L  | 2  | Flowers      | Decoction | To treat eczema                                | EMA/HMPC/228356/2012<br><i>Verbasci flos</i> ; Cough and cold                           |
| <i>Solanaceae</i>       | <i>Solanum tuberosum</i> L.          | Bulbē       | KL | 10 | Lumps        | Compress  | For burns<br>From swollen eyes                 |                                                                                         |
| <i>Solanaceae</i>       | <i>Solanum dulcamara</i> L.          | Karklavijas | L  | 1  | Stem         | Decoction | For furuncles                                  |                                                                                         |
| <i>Violaceae</i>        | <i>Viola tricolor</i> L.             | Našlele     | L  | 7  | Aerial parts | Decoction | For furuncles<br>To treat eczema<br>For rashes | EMA/HMPC/131734/2009<br><i>Violae herba cum flore</i> ; Skin disorders and minor wounds |
